# Supplementary material
Source: Springer Nature journal article supplement (https://www.springermedizin.de/resource/supplementary/12902_2012_123_MOESM5_ESM.pdf/9515594)

# Cardiovascular events

|                   | Odds ratio | Lower limit | Upper limit | p-Value |
|-------------------|------------|-------------|-------------|---------|
| Acarturk, 2004    | 1.62       | 1.02        | 2.58        | 0.04    |
| Bansal, 2007      | 1.11       | 0.92        | 1.34        | 0.28    |
| Bonaventure, 2010 | 1.49       | 1.24        | 1.79        | 0.00    |
| Chester, 1995     | 2.30       | 1.68        | 3.16        | 0.00    |
| Czernichow, 2007  | 1.30       | 1.21        | 1.39        | 0.00    |
| Drexel, 2005      | 1.17       | 1.00        | 1.37        | 0.05    |
| Eberly, 2003      | 1.64       | 1.20        | 2.24        | 0.00    |
| Egger, 1999       | 1.12       | 0.88        | 1.43        | 0.36    |
| Goldberg, 2009    | 7.96       | 2.65        | 23.94       | 0.00    |
| Hoogeveen, 2001   | 1.07       | 0.98        | 1.16        | 0.12    |
| Lamarche, 1995    | 3.10       | 1.54        | 6.25        | 0.00    |
| Lu, 2003          | 1.42       | 1.11        | 1.81        | 0.00    |
| Mora, 2008        | 1.47       | 1.00        | 2.16        | 0.05    |
| Rubins, 1999      | 1.12       | 0.86        | 1.46        | 0.39    |
| Samuelsson, 1994  | 1.21       | 1.03        | 1.43        | 0.02    |
| Valdivielso, 2009 | 4.41       | 1.59        | 12.22       | 0.00    |
|                   | 1.37       | 1.23        | 1.53        | 0.00    |

Odds ratio and 95% CI

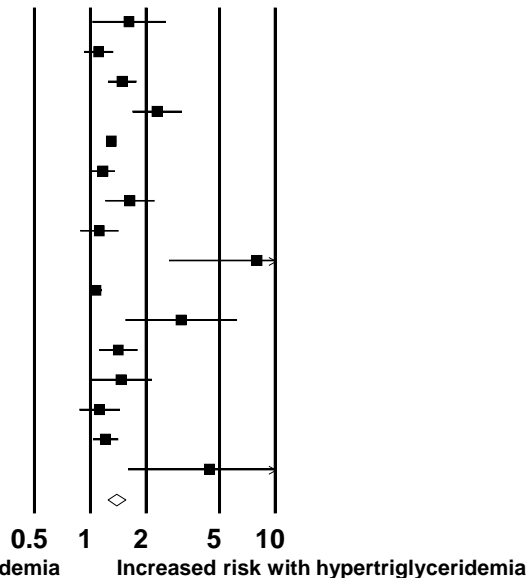

Supplement: MOESM5 [file 9515594]
